# Supplementary material for: Decoupling sleep and brain size in childhood: An investigation of genetic covariation in the ABCD study
Source: bioRxiv or medRxiv preprint supplement (doi:10.1101/2020.10.02.20204735), 2021-09-02
Supplement: Supplementary file [file media-1.pdf]

**The genetic etiology of childhood insomnia:  
Longitudinal gene-brain-behavior associations in the ABCD study**

Leanna M. Hernandez, Ph.D.<sup>1</sup>  
Minsoo Kim, B.S.<sup>1,2,9</sup>  
Cristian Hernandez, B.A.<sup>1</sup>  
Wesley Thompson, Ph.D.<sup>3</sup>  
Chun Chieh Fan M.D., Ph.D.<sup>4</sup>  
Adriana Galván, Ph.D.<sup>5</sup>  
Mirella Dapretto, Ph.D.<sup>1,6</sup>  
Susan Y. Bookheimer, Ph.D.<sup>1,7</sup>  
Andrew Fuligni, Ph.D.<sup>1,5</sup>  
Michael Gandal, M.D., Ph.D.<sup>1,2,8,9</sup>

<sup>1</sup>Department of Psychiatry and Biobehavioral Sciences, Semel Institute, David Geffen School of Medicine, University of California Los Angeles, 695 Charles E. Young Drive South, Los Angeles, CA 90095, USA.

<sup>2</sup>Program in Neurobehavioral Genetics, Semel Institute, David Geffen School of Medicine, University of California, Los Angeles, Los Angeles, CA 90095, USA.

<sup>3</sup>Department of Family Medicine and Public Health, University of California, San Diego, San Diego, CA 92093, USA.

<sup>4</sup>Department of Cognitive Science, University of California, Los Angeles, Los Angeles, CA 90095, USA.

<sup>5</sup>Department of Psychology, University of California, Los Angeles, Los Angeles, CA 90095, USA.

<sup>6</sup>Ahmanson-Lovelace Brain Mapping Center, University of California, Los Angeles, Los Angeles, CA 90095, USA.

<sup>7</sup>Staglin IMHRO Center for Cognitive Neuroscience, University of California, Los Angeles, Los Angeles, CA 90024, USA.

<sup>8</sup>Department of Neurology, Center for Autism Research and Treatment, Semel Institute, David Geffen School of Medicine, University of California, Los Angeles, 695 Charles E. Young Drive South, Los Angeles, CA 90095, USA.

<sup>9</sup>Department of Human Genetics, David Geffen School of Medicine, University of California, Los Angeles, Los Angeles, CA 90095, USA.

**Author Disclosures:** All authors report no biomedical financial interests or potential conflicts of interests.

**Corresponding author:** Michael Gandal, MD, Ph.D, Assistant Professor, Neuroscience Research Building, 635 Charles E Young Dr S, Los Angeles, CA 90095, University of California, Los Angeles, [MGandal@mednet.ucla.edu](mailto:MGandal@mednet.ucla.edu); Leanna Hernandez, PhD, Postdoctoral Fellow, Neuroscience Research Building, 635 Charles E Young Dr S, Los Angeles, CA 90095, University of California, Los Angeles, [leannahernandez@ucla.edu](mailto:leannahernandez@ucla.edu)

## **Methods**

### ***Subject characteristics***

Demographic data obtained from the NDA included age (months), sex (male/female), parental education, family income, family ID/relationship status (i.e., an indication of subjects who are siblings), self-reported race/ethnicity, and MRI scanner serial number (Table 1).

### ***Sleep Disturbance Scale for Children***

An insomnia score was computed for each subject by adding scores across 1) a single question that asked “How long after going to bed does your child usually fall asleep?,” for which parents could choose one of five choices ranging from “less than 15 minutes” to “more than 60 minutes”, and 2) three questions for which parents made Likert-style choices ranging from 1 (never) to 5 (always/daily): “The child has difficulty getting to sleep at night”; “The child wakes up more than twice per night”; “After waking up at night, the child has difficulty to fall asleep again.” Insomnia scores thus ranged from 4-20 and did not include total sleep duration.

### ***Structural magnetic resonance imaging***

All structural neuroimaging data were processed by the ABCD Data Analysis and Informatics Core (DAIC) and extensive documentation of image acquisition<sup>1</sup> and processing<sup>2</sup> methods is provided elsewhere. Briefly, quality control of sMRI images included a manual review of images for artifacts including wrap-around, missing brain due to improper slice prescription, signal drop out due to magnetic susceptibility artifacts, and motion. Tabulated ABCD sMRI data included a binary QC code for each participant (0=reject, 1=accept), which was used to remove subjects with poor quality sMRI data. Reconstruction of the cortical surface and brain segmentation was performed in FreeSurfer v5.3 (<http://surfer.nmr.mgh.harvard.edu/>). Morphometric measurements of cortical thickness (CT), surface area (SA), and subcortical volume (VOL) were calculated in FreeSurfer using the Desikan parcellation atlas.<sup>3</sup> Quality control of FreeSurfer data was performed by trained reviewers based on the presence of motion, intensity inhomogeneity, white matter underestimation, pila overestimation, and the presence of magnetic susceptibility artifacts. Tabulated sMRI data included a binary FreeSurfer QC score for each participant (0=reject, 1=accept), which was used to remove subjects with poor quality data.

### ***Genetics***

Sample preparation and genotyping were performed at the Rutgers University Cell and DNA Repository (RUCDR). Genotyping data for 733,293 single nucleotide polymorphisms (SNPs) was generated using the Affymetrix NIDA Smokescreen Array. After applying filters for genotyping quality control (QC) based on call signals and call rates, a total of 573,845 genetic variants remained. For subjects who had good quality genotyping data, the ABCD DAIC performed QC to remove individuals who had a missing rate of greater than 20% or for whom there may have been sample contamination, resulting in 10,627 subjects whose genotyping data were acquired from the NDA.

## Results

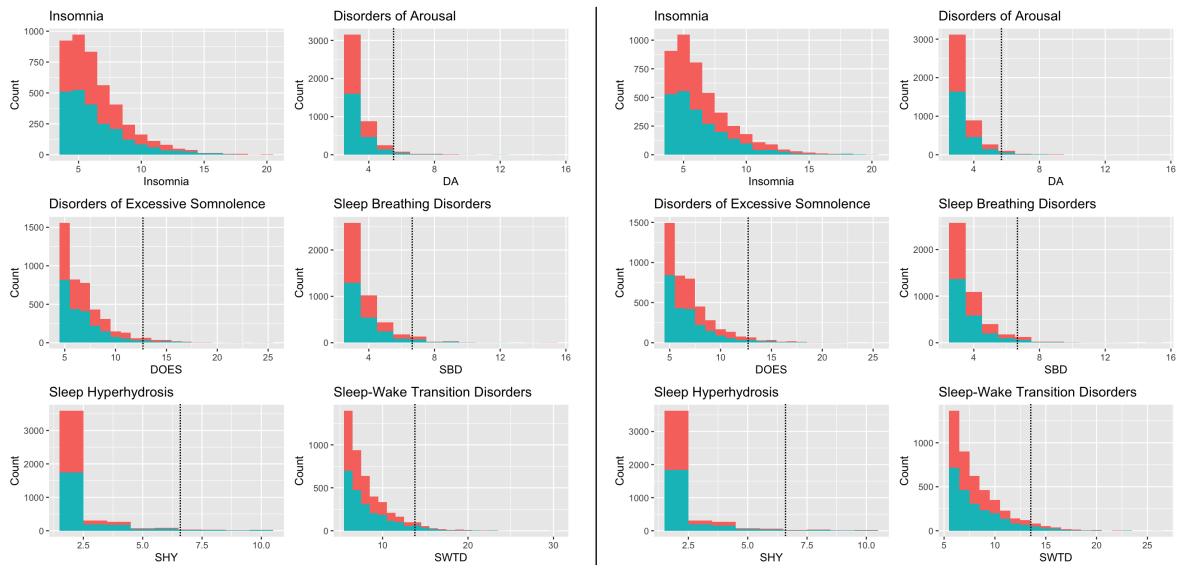

**Supplementary Figure 1.** Distribution of raw scores for insomnia and 5 subscales of the Sleep Disturbance Scale for Children (SDSC) in discovery (left) and replication (right) cohorts. Clinically disturbed sleep is defined as having a total t-score above 70, indicated by the dashed lines. Data are displayed as a function of sex; red = female, blue = male. Abbreviations: DA, Disorders of Arousal; DOES, Disorders of Excessive Somnolence; SBD, Sleep Breathing Disorders; SHY, Sleep Hyperhydrosis; SWTD, Sleep-Wake Transition Disorders.

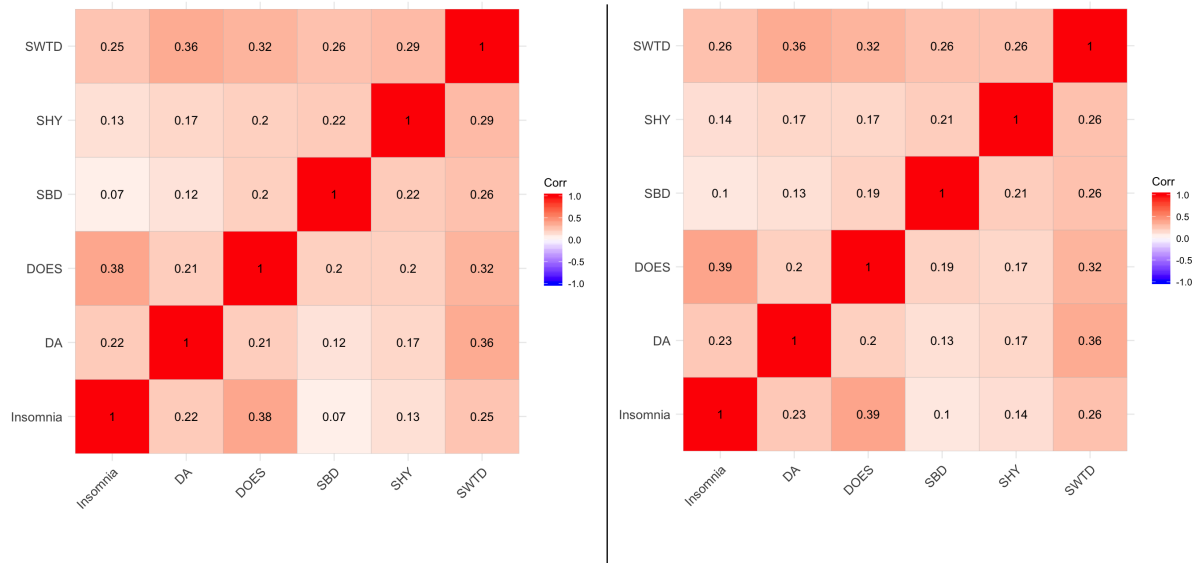

**Supplementary Figure 2.** Spearman Rank-Order correlations between subscales of the Sleep Disturbance Scale for Children (SDSC) in discovery (left) and replication (right) cohorts. Abbreviations: DA, Disorders of Arousal; DOES, Disorders of Excessive Somnolence; SBD, Sleep Breathing Disorders; SHY, Sleep Hyperhydrosis; SWTD, Sleep-Wake Transition Disorders.

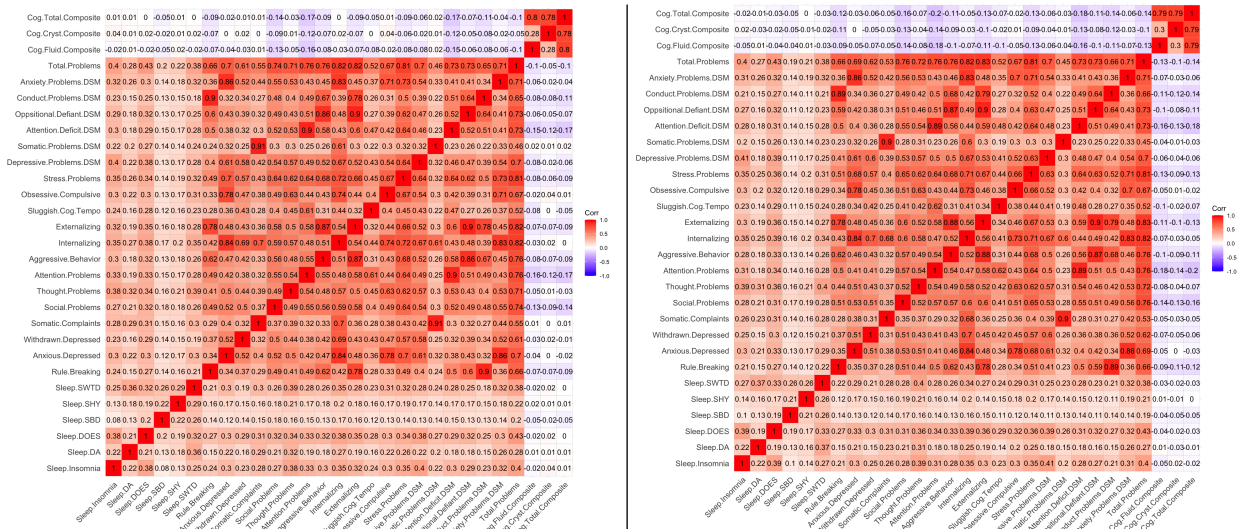

**Supplementary Figure 3.** Spearman Rank-Order correlations between subscales of the Sleep Disturbance Scale for Children (SDSC), Child Behavior Checklist (CBCL), and cognition in discovery (left) and replication (right) cohorts. Abbreviations: DA, Disorders of Arousal; DOES, Disorders of Excessive Somnolence; SBD, Sleep Breathing Disorders; SHY, Sleep Hyperhidrosis; SWTD, Sleep-Wake Transition Disorders; Cog, Cognition.

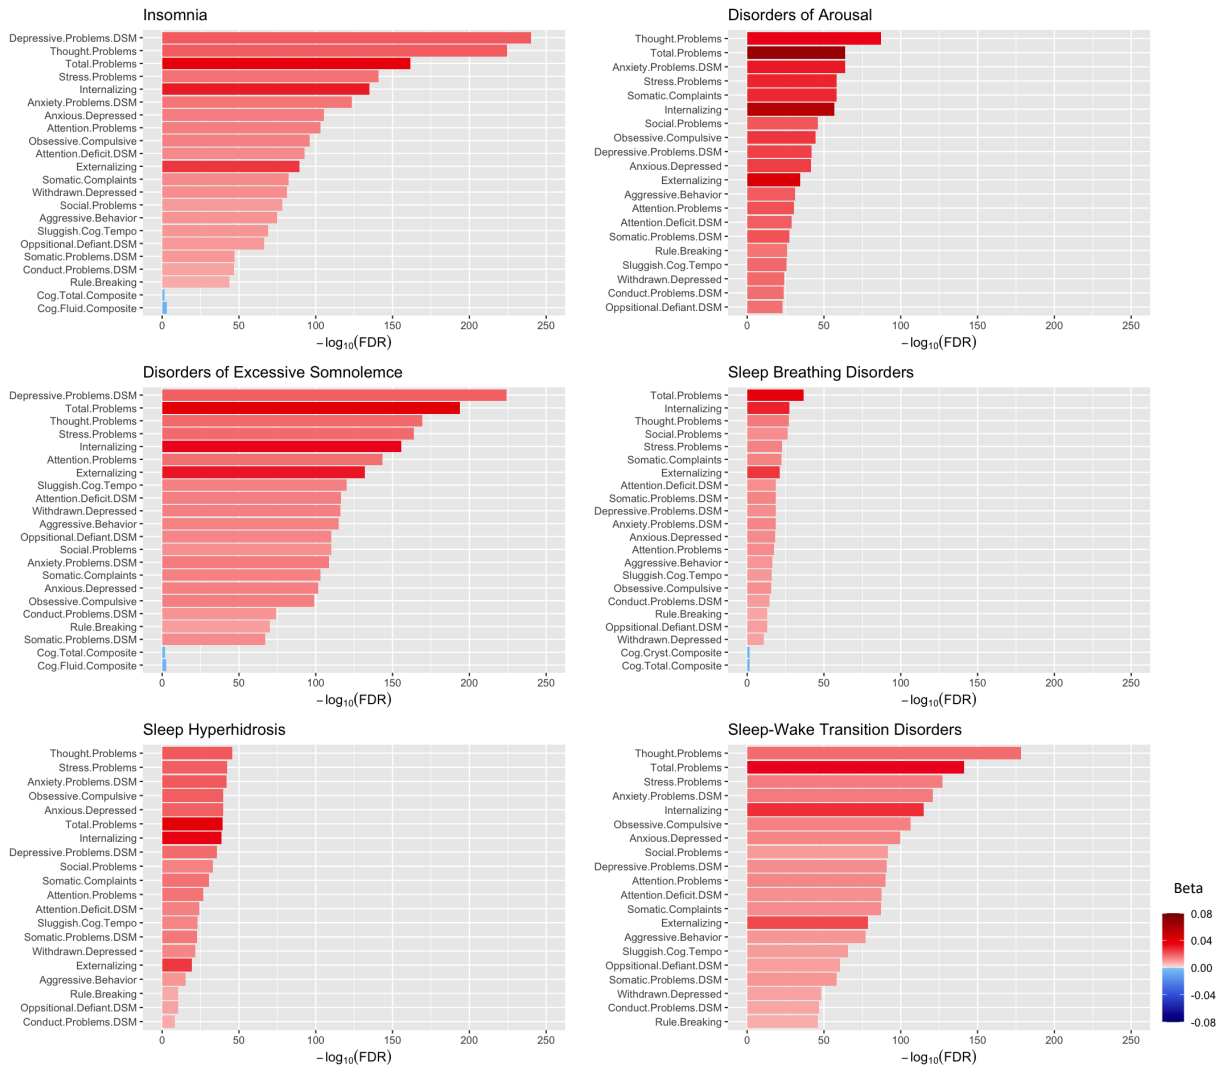

**Supplementary Figure 4.** Associations between the Sleep Disturbance Scale for Children (SDSC), Child Behavior Checklist (CBCL), and cognition in the replication cohort. Abbreviations: CBCL, Child Behavior Checklist; DSM, Diagnostic and Statistical Manual of Mental Disorders; Cog, Cognition.

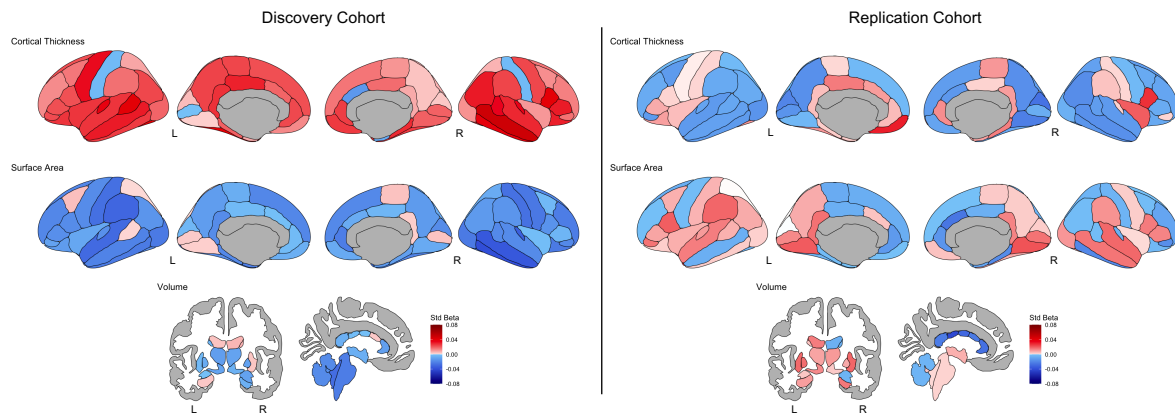

**Supplementary Figure 5.** Associations between Disorders of Arousal (DA) and regional brain structure. See Supplementary Tables 10-12. Abbreviations: Std, Standardized; L, left; R, right.

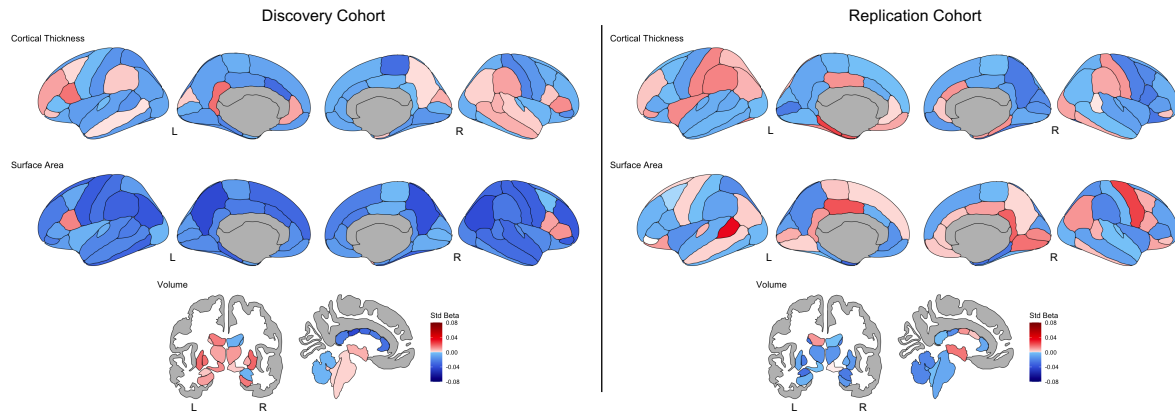

**Supplementary Figure 6.** Associations between Disorders of Excessive Somnolence (DOES) and regional brain structure. See Supplementary Tables 13-15. Abbreviations: Std, Standardized; L, left; R, right.



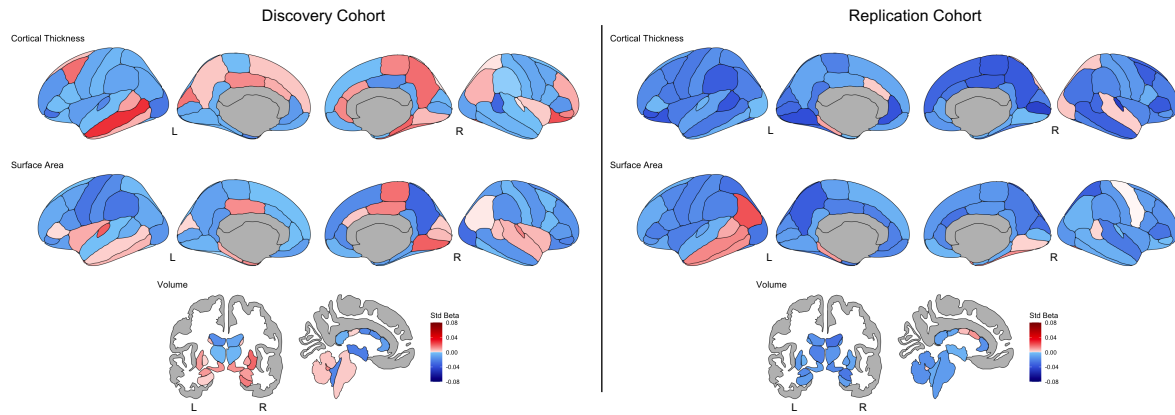

**Supplementary Figure 7.** Associations between Sleep Breathing Disorders (SBD) and regional brain structure. See Supplementary Tables 16-18. Abbreviations: Std, Standardized; L, left; R, right.

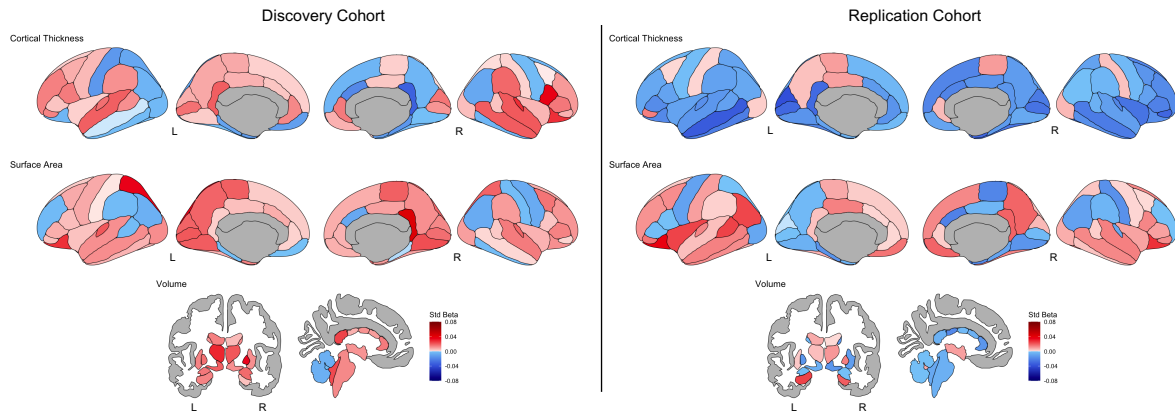

**Supplementary Figure 8.** Associations between Sleep Hyperhidrosis (SHY) and regional brain structure. See Supplementary Tables 19-21. Abbreviations: Std, Standardized; L, left; R, right.

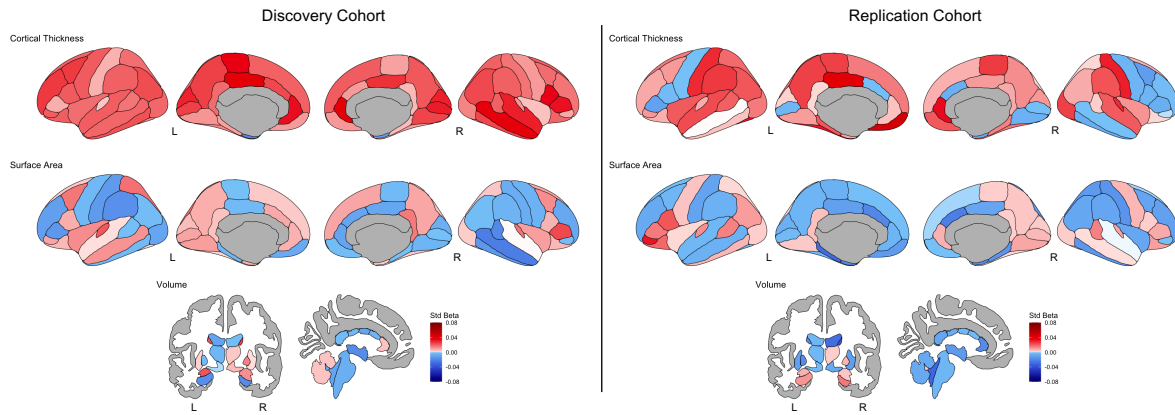

**Supplementary Figure 9.** Associations between Sleep-Wake Transition Disorders (SWTD) and regional brain structure. See Supplementary Tables 22-24. Abbreviations: Std, Standardized; L, left; R, right.

**References**

1. Casey, B. J. *et al.* The Adolescent Brain Cognitive Development (ABCD) study: Imaging acquisition across 21 sites. *Dev. Cogn. Neurosci.* **32**, 43–54 (2018).
2. Hagler, D. J. *et al.* Image processing and analysis methods for the Adolescent Brain Cognitive Development Study. *Neuroimage* **202**, (2019).
3. Desikan, R. S. *et al.* An automated labeling system for subdividing the human cerebral cortex on MRI scans into gyral based regions of interest. *Neuroimage* **31**, 968–980 (2006).
